# Supplementary material for: Conjugated linker correlated energetics and kinetics in dithienopyrrole dye-sensitized solar cells
Source: Royal Society of Chemistry journal article supplement (doi:10.1039/c3ee40375k), 2013-01-01
Supplement: c3ee40375k.pdf [file c3ee40375k.pdf]

*Electronic supplementary information for*

**Conjugated linker correlated energetics and kinetics in dithienopyrrole dye-sensitized solar cells**

Jing Zhang, Zhaoyang Yao, Yanchun Cai, Lin Yang, Mingfei Xu, Renzhi Li,\* Min Zhang,\* Xiandui Dong and Peng Wang\*

*State Key Laboratory of Polymer Physics and Chemistry, Changchun Institute of Applied Chemistry, Chinese Academy of Sciences, Changchun 130022, China*



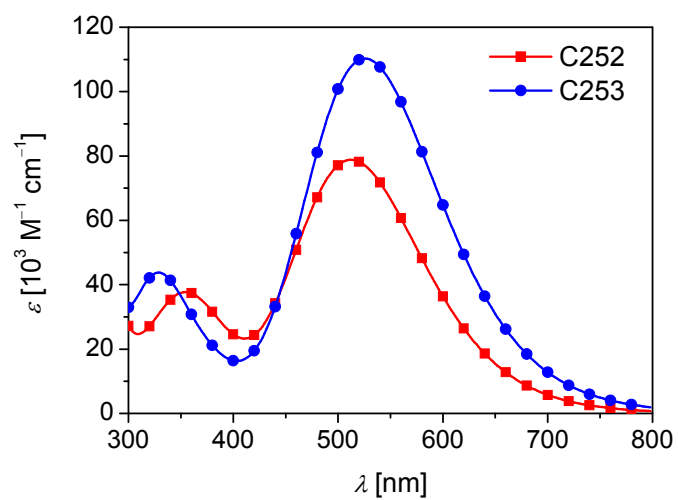

**Fig. S2** Simulated electronic absorption spectra of **C252** and **C253** in THF at the CAM-B3LYP/6-31G(d,p) level.

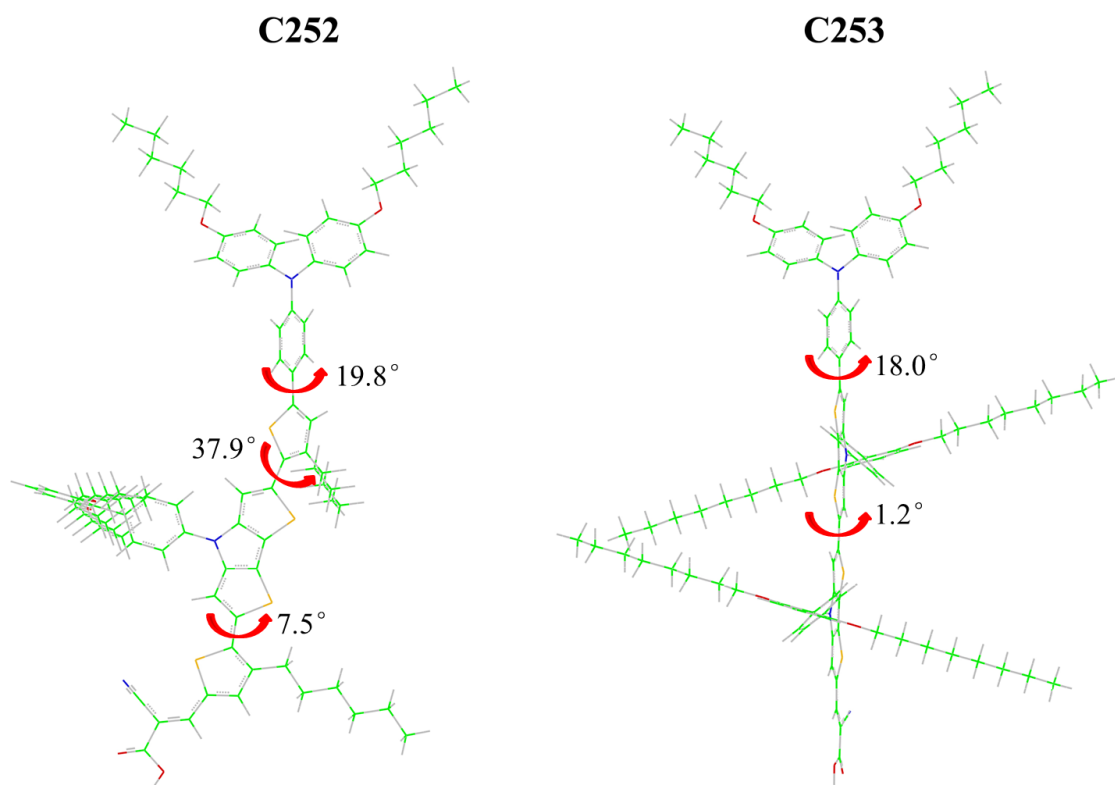

**Fig. S3** Optimized geometries of C252 and C253.

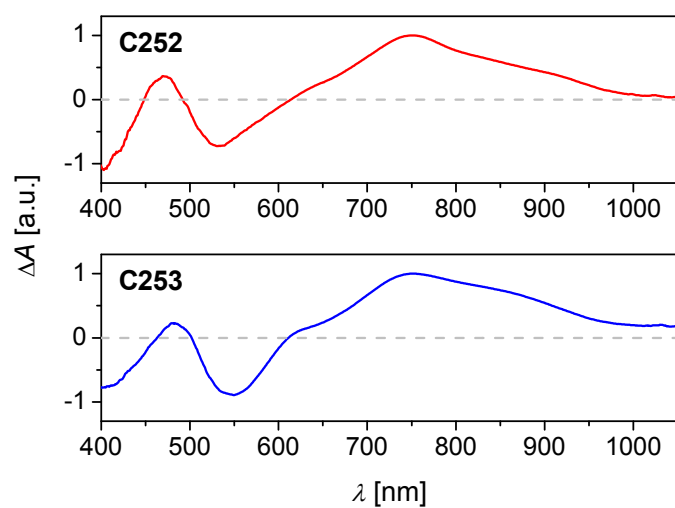

**Fig. S4** Absorption change as a function of wavelength, upon applying a small positive potential to 2- $\mu\text{m}$ -thick, dye-coated titania films dipped in EMITFSI.

**Table S1** Intensities of the Ti2p<sub>3/2</sub> signals and mean thicknesses of the dye coatings on titania calculated *via* empirical equations and parameters

| Sample                        | Intensity [cps] | <i>d</i> [Å] |
|-------------------------------|-----------------|--------------|
| TiO <sub>2</sub>              | 74047           | —            |
| <b>C252</b> /TiO <sub>2</sub> | 26288           | 33.1         |
| <b>C253</b> /TiO <sub>2</sub> | 34151           | 24.5         |

**Scheme S1** Synthetic route for **C252**<sup>a</sup>

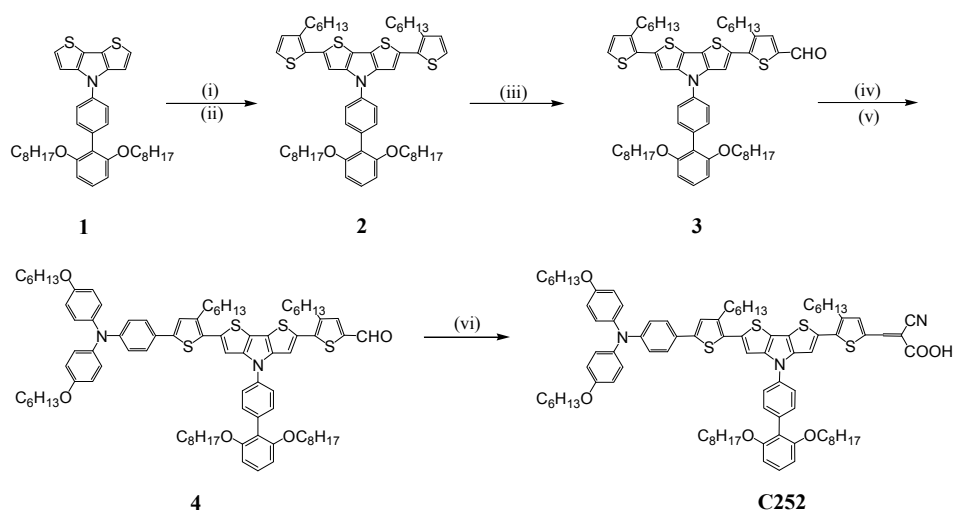

<sup>a</sup> Reagents and conditions: (i) 2.0 equiv *t*-BuLi, THF, -78 °C, 3 h; 2.0 equiv Me<sub>3</sub>SnCl, -78 °C to RT, overnight; (ii) 3.0 equiv 2-bromo-3-hexylthiophene, 12% P(*t*-Bu)<sub>3</sub>, 3% Pd<sub>2</sub>(dba)<sub>3</sub>, 4.4 equiv CsF, dioxane, reflux, 4 h; (iii) 5.0 equiv DMF, 1.2 equiv POCl<sub>3</sub>, DCE, 0 °C to RT, 24 h; (iv) 1.0 equiv NBS, THF, 0 °C, overnight; (v) 1.1 equiv 4,4,5,5-tetramethyl-2-{4-[*N,N*-bis(4-hexyloxyphenyl)amino]phenyl}-1,3,2-dioxaborolane, 2% Pd(OAc)<sub>2</sub>, 2% SPhos, 5.0 equiv K<sub>3</sub>PO<sub>4</sub>, dioxane/H<sub>2</sub>O (v/v, 5/1), RT, overnight; (vi) 3.0 equiv cyanoacetic acid, 7.0 equiv piperidine, CHCl<sub>3</sub>, reflux, 12 h.

**Scheme S2** Synthetic route for **C253**<sup>b</sup>

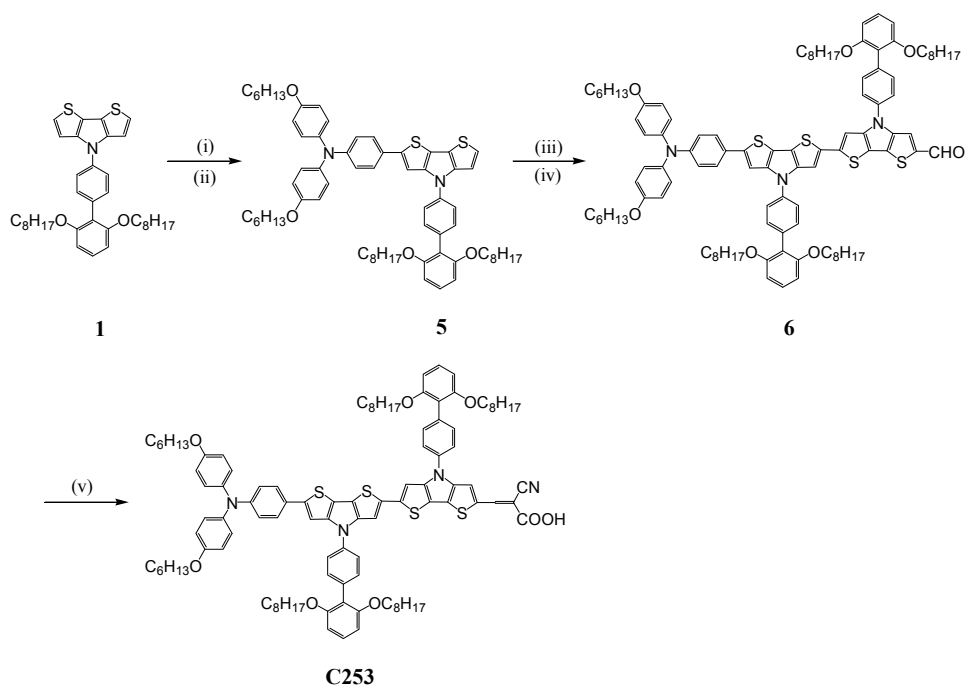

<sup>b</sup> Reagents and conditions: (i) 1.0 equiv *t*-BuLi, THF,  $-78\text{ }^{\circ}\text{C}$ , 4 h; 1.0 equiv  $\text{Me}_3\text{SnCl}$ ,  $-78\text{ }^{\circ}\text{C}$  to RT, overnight; (ii) 1.1 equiv *N,N*-bis(4-hexyloxyphenyl)-4-bromoaniline, 12%  $\text{P}(t\text{-Bu})_3$ , 3%  $\text{Pd}_2(\text{dba})_3$ , 2.2 equiv CsF, dioxane, reflux, 4 h; (iii) 1.5 equiv *t*-BuLi, THF,  $-78\text{ }^{\circ}\text{C}$  to RT, 3 h; 1.5 equiv  $\text{Me}_3\text{SnCl}$ ,  $-78\text{ }^{\circ}\text{C}$  to RT, overnight; (iv) 0.9 equiv 4-(2',6'-bis(octyloxy)biphenyl-4-yl)-6-bromo-4*H*-dithieno[3,2-*b*:2',3'-*d*]pyrrole-2-carbaldehyde, 12%  $\text{P}(t\text{-Bu})_3$ , 3%  $\text{Pd}_2(\text{dba})_3$ , 2.2 equiv CsF, dioxane, reflux, 4 h; (v) 3.0 equiv cyanoacetic acid, 7.0 equiv piperidine,  $\text{CHCl}_3$ , reflux, 12 h.
